# Supplementary material for: Hybridization, missing wild ancestors and the domestication of cultivated diploid bananas
Source: Front Plant Sci. 2022 Oct 7;13:969220. doi: 10.3389/fpls.2022.969220 (PMC9586208; doi:10.3389/fpls.2022.969220)
Supplement: Supplementary file 4 [file Table_4.xlsx]

## Sheet: Feuil1
				AA NG1'			banksii'
Chrom.	Window (start)	SNPs	Fst	SNPs	Taj.'s D	Pix10e6	SNPs	Taj.'s D	Pix10e6
chr01	12800000	6	0.765866	0	0	0	6	1.2585	8.10691
chr01	27400000	8	0.744766	6	-1.68572	1.54681	6	0.166999	5.48784
chr04	4600000	10	0.766552	10	-1.8541	3.22053	1	0	0.441347
chr04	4800000	16	0.747481	16	-2.14579	4.14336	1	0	1.48664
chr04	5000000	25	0.91813	22	-2.48*	4.20418	3	1.42176	4.91871
chr04	5200000	15	0.883438	14	-2.17533	3.44529	3	0.250762	2.62486
chr04	20400000	5	0.849619	2	1.13371	3.20201	4	-1.72493	1.12079
chr04	20600000	3	0.881353	1	0	1.86145	3	-1.52476	0.871082
chr04	21200000	4	0.858134	3	-1.08881	1.08409	4	-1.07729	2.02091
chr04	21400000	5	0.763653	5	-1.06071	2.65997	5	-0.901727	3.41464
chr04	22000000	9	0.807467	9	-1.04169	4.56905	5	-1.08472	2.99652
chr04	30600000	22	0.758881	19	-2.10134	5.8964	21	0.926671	26.6961
chr05	8400000	6	0.770456	6	-0.663584	4.05344	6	-0.080122	5.11618
chr06	13000000	17	0.75261	16	-0.996484	10.5395	9	-1.35493	4.41351
chr09	37800000	23	0.834589	18	-1.14844	9.94198	10	0.584898	9.90722
chr09	38000000	34	0.821871	24	-1.19464	13.0859	21	-0.310879	16.6031
